# Supplementary material for: Primary care consultations for respiratory tract symptoms during the COVID-19 pandemic: a cohort study including 70,000 people in South West England
Source: PubMed Central journal article supplement (PMC9155167; doi:10.1093/fampra/cmab127), 2021-10-11
Supplement: cmab127_suppl_supplementary_material.pdf [file cmab127_suppl_supplementary_material.pdf]

**Supplementary Table 1: Summary of consultations for acute respiratory symptoms by sociodemographic and clinical characteristics before and during the COVID-19 pandemic in the same cohort (n=70431)**

|                         | TOTAL CONSULTATIONS |                 | FACE-TO-FACE AT THE PRACTICE |                 | HOME VISITS     |                 | OUT OF HOURS    |                 | VIDEO/EMAIL     |                 | TELEPHONE       |                 |
|-------------------------|---------------------|-----------------|------------------------------|-----------------|-----------------|-----------------|-----------------|-----------------|-----------------|-----------------|-----------------|-----------------|
|                         | Before pandemic     | During pandemic | Before pandemic              | During pandemic | Before pandemic | During pandemic | Before pandemic | During pandemic | Before pandemic | During pandemic | Before pandemic | During pandemic |
| Number of consultations | 31574               | 103999          | 3678                         | 7066            | 2474            | 5078            | 2358            | 3470            | 580             | 9708            | 22484           | 78677           |
| Sex                     |                     |                 |                              |                 |                 |                 |                 |                 |                 |                 |                 |                 |
| Female n (%)            | 19825<br>(62.8)     | 62725<br>(60.3) | 2285<br>(62.1)               | 4300<br>(60.9)  | 1597<br>(64.6)  | 2939<br>(57.9)  | 1494<br>(63.4)  | 1932<br>(55.7)  | 419<br>(72.2)   | 6622<br>(68.2)  | 14030<br>(62.4) | 46932<br>(59.7) |
| Male n (%)              | 11749<br>(37.2)     | 41274<br>(39.7) | 1393<br>(37.9)               | 2766<br>(39.1)  | 877<br>(35.4)   | 2139<br>(42.1)  | 864<br>(36.6)   | 1538<br>(44.3)  | 161<br>(27.8)   | 3086<br>(31.8)  | 8454<br>(37.6)  | 31745<br>(40.4) |
| Missing n (%)           | 0 (0)               | 0 (0)           | 0 (0)                        | 0 (0)           | 0 (0)           | 0 (0)           | 0 (0)           | 0 (0)           | 0 (0)           | 0 (0)           | 0 (0)           | 0 (0)           |
| Age                     |                     |                 |                              |                 |                 |                 |                 |                 |                 |                 |                 |                 |
| Age mean (SD)           | 58.7<br>(25.3)      | 56.9<br>(25.2)  | 55.4<br>(24.5)               | 55.2<br>(24.2)  | 78.6<br>(15.7)  | 78.3<br>(14.7)  | 52.1<br>(28.2)  | 55.4<br>(27.3)  | 42.8<br>(15.5)  | 51.6<br>(24.9)  | 58<br>(24.9)    | 55.7<br>(25.0)  |
| Missing n (%)           | 0 (0)               | 0 (0)           | 0 (0)                        | 0 (0)           | 0 (0)           | 0 (0)           | 0 (0)           | 0 (0)           | 0 (0)           | 0 (0)           | 0 (0)           | 0 (0)           |
| Ethnicity               |                     |                 |                              |                 |                 |                 |                 |                 |                 |                 |                 |                 |
| Asian n (%)             | 231<br>(0.7)        | 1359<br>(1.3)   | 39<br>(1.1)                  | 47<br>(0.7)     | 11<br>(0.4)     | 19<br>(0.4)     | 16<br>(0.7)     | 13<br>(0.4)     | 10<br>(1.7)     | 231<br>(2.4)    | 155<br>(0.7)    | 1049<br>(1.4)   |
| Black n (%)             | 79<br>(0.3)         | 257<br>(0.3)    | 5<br>(0.1)                   | 16<br>(0.2)     | 11<br>(0.4)     | 15<br>(0.3)     | 5<br>(0.2)      | 6<br>(0.2)      | 6<br>(1.0)      | 50<br>(0.5)     | 52<br>(0.2)     | 170<br>(0.2)    |
| Mixed or Other n (%)    | 121<br>(0.4)        | 532<br>(0.5)    | 4<br>(0.1)                   | 32<br>(0.5)     | 8<br>(0.3)      | 39<br>(0.8)     | 11<br>(0.5)     | 10<br>(0.3)     | 1<br>(0.2)      | 107<br>(1.1)    | 97<br>(0.4)     | 344<br>(0.4)    |
| White n (%)             | 9753<br>(30.9)      | 33169<br>(31.9) | 684<br>(18.6)                | 1538<br>(21.8)  | 1319<br>(53.4)  | 2787<br>(54.8)  | 1023<br>(43.4)  | 1335<br>(38.5)  | 444<br>(76.6)   | 5471<br>(56.4)  | 6283<br>(27.9)  | 22038<br>(28.0) |
| Missing n (%)           | 21390<br>(67.7)     | 68682<br>(66.0) | 2946<br>(80.1)               | 5433<br>(76.8)  | 1125<br>(45.5)  | 2218<br>(43.7)  | 1303<br>(55.2)  | 2106<br>(60.6)  | 119<br>(20.5)   | 3849<br>(39.6)  | 15897<br>(70.8) | 55076<br>(70.0) |

|                        |                 |                 |                |                |                |                |               |                |               |                |                |                 |
|------------------------|-----------------|-----------------|----------------|----------------|----------------|----------------|---------------|----------------|---------------|----------------|----------------|-----------------|
|                        |                 |                 |                |                |                |                |               |                |               |                |                |                 |
| IMD                    |                 |                 |                |                |                |                |               |                |               |                |                |                 |
| 1 n (%) most deprived  | 5435<br>(17.2)  | 17976<br>(17.3) | 1052<br>(28.7) | 1900<br>(26.9) | 288<br>(11.6)  | 648<br>(12.8)  | 531<br>(22.5) | 755<br>(21.8)  | 43<br>(7.4)   | 1271<br>(13.1) | 3521<br>(15.7) | 13402<br>(17.0) |
| 2 n (%)                | 7710<br>(24.4)  | 24560<br>(23.6) | 980<br>(26.6)  | 1514<br>(21.4) | 565<br>(22.8)  | 951<br>(18.7)  | 481<br>(20.4) | 778<br>(22.3)  | 81<br>(14.0)  | 2038<br>(21.0) | 5603<br>(24.9) | 19279<br>(24.5) |
| 3 n (%)                | 6023<br>(19.1)  | 20374<br>(19.6) | 729<br>(19.8)  | 1075<br>(15.2) | 457<br>(18.5)  | 941<br>(18.5)  | 406<br>(17.2) | 630<br>(18.2)  | 45<br>(7.8)   | 1915<br>(19.7) | 4386<br>(19.5) | 15813<br>(20.1) |
| 4 n (%)                | 5822<br>(18.4)  | 19801<br>(19.0) | 449<br>(12.2)  | 1230<br>(17.4) | 464<br>(18.8)  | 1098<br>(21.6) | 464<br>(19.7) | 675<br>(19.5)  | 101<br>(17.4) | 1850<br>(19.1) | 4344<br>(19.3) | 14948<br>(19.0) |
| 5 n (%) least deprived | 6030<br>(19.1)  | 19650<br>(18.9) | 401<br>(10.9)  | 1219<br>(17.3) | 678<br>(27.4)  | 1396<br>(27.5) | 406<br>(17.2) | 581<br>(16.7)  | 287<br>(49.4) | 2398<br>(24.7) | 4258<br>(18.9) | 14056<br>(17.9) |
| Missing n(%)           | 554<br>(1.8)    | 1638<br>(1.6)   | 67<br>(1.8)    | 128<br>(1.8)   | 22<br>(0.9)    | 44<br>(0.9)    | 70<br>(3.0)   | 51<br>(1.5)    | 23<br>(4.0)   | 236<br>(2.4)   | 372<br>(1.7)   | 1179<br>(1.5)   |
| Smoking                |                 |                 |                |                |                |                |               |                |               |                |                |                 |
| Current Smoker n (%)   | 4640<br>(14.7)  | 15730<br>(15.1) | 678<br>(18.4)  | 1351<br>(19.1) | 180<br>(7.3)   | 424<br>(8.3)   | 469<br>(19.9) | 581<br>(16.7)  | 66<br>(11.4)  | 1296<br>(13.3) | 3247<br>(14.4) | 12078<br>(15.4) |
| Ex-Smoker n (%)        | 11351<br>(36.0) | 37729<br>(36.3) | 1357<br>(36.9) | 2436<br>(34.5) | 1041<br>(42.1) | 2224<br>(43.8) | 726<br>(30.8) | 1156<br>(33.4) | 178<br>(30.6) | 3024<br>(31.2) | 8049<br>(35.8) | 28889<br>(36.7) |
| Never Smoked n (%)     | 13668<br>(43.2) | 44338<br>(42.6) | 1447<br>(39.3) | 2904<br>(41.1) | 1210<br>(48.9) | 2364<br>(46.6) | 912<br>(38.7) | 1414<br>(40.7) | 331<br>(57.1) | 4771<br>(49.1) | 9768<br>(43.5) | 32885<br>(41.8) |
| Missing n (%)          | 1915<br>(6.1)   | 6202<br>(6.0)   | 196<br>(5.4)   | 375<br>(5.3)   | 43<br>(1.7)    | 66<br>(1.3)    | 251<br>(10.6) | 319<br>(9.2)   | 5<br>(0.9)    | 617<br>(6.4)   | 1420<br>(6.3)  | 4825<br>(6.1)   |
| Total co-morbidities   |                 |                 |                |                |                |                |               |                |               |                |                |                 |
| 0                      | 8279<br>(26.2)  | 28381<br>(27.3) | 1011<br>(27.4) | 2011<br>(28.5) | 405<br>(16.4)  | 685<br>(13.5)  | 754<br>(32.0) | 1161<br>(33.4) | 262<br>(45.1) | 3738<br>(38.5) | 5847<br>(26.0) | 20786<br>(26.5) |
| 1                      | 7382<br>(23.4)  | 25069<br>(24.1) | 940<br>(25.6)  | 1803<br>(25.5) | 446<br>(18.0)  | 938<br>(18.5)  | 520<br>(22.1) | 839<br>(24.2)  | 186<br>(32.1) | 2647<br>(27.2) | 5290<br>(23.5) | 18842<br>(23.9) |
| 2                      | 4890<br>(15.5)  | 17232<br>(16.6) | 566<br>(15.4)  | 1236<br>(17.5) | 299<br>(12.1)  | 774<br>(15.2)  | 404<br>(17.1) | 488<br>(14.1)  | 96<br>(16.6)  | 1452<br>(15.0) | 3525<br>(15.7) | 13282<br>(16.9) |

|                                                                                                                                                                                                                                                                                                                                                                                                                 |                 |                 |                |                |                |                |                |                |               |                |                 |                 |
|-----------------------------------------------------------------------------------------------------------------------------------------------------------------------------------------------------------------------------------------------------------------------------------------------------------------------------------------------------------------------------------------------------------------|-----------------|-----------------|----------------|----------------|----------------|----------------|----------------|----------------|---------------|----------------|-----------------|-----------------|
|                                                                                                                                                                                                                                                                                                                                                                                                                 |                 |                 |                |                |                |                |                |                |               |                |                 |                 |
| 3                                                                                                                                                                                                                                                                                                                                                                                                               | 3937<br>(12.5)  | 12892<br>(12.4) | 407<br>(11.1)  | 746<br>(10.6)  | 377<br>(15.2)  | 814<br>(16.0)  | 259<br>(11.0)  | 398<br>(11.5)  | 26<br>(4.5)   | 873<br>(9.0)   | 2868<br>(12.8)  | 10061<br>(12.8) |
| 4                                                                                                                                                                                                                                                                                                                                                                                                               | 3169<br>(10.0)  | 9058<br>(8.7)   | 347<br>(9.4)   | 547<br>(7.7)   | 360<br>(14.6)  | 734<br>(14.5)  | 182<br>(7.7)   | 279<br>(8.0)   | 6<br>(1.0)    | 475<br>(4.9)   | 2274<br>(10.1)  | 7023<br>(8.9)   |
| >=5                                                                                                                                                                                                                                                                                                                                                                                                             | 3917<br>(12.4)  | 11367<br>(10.9) | 407<br>(11.1)  | 723<br>(10.2)  | 587<br>(23.7)  | 1133<br>(22.3) | 239<br>(10.1)  | 305<br>(8.8)   | 4<br>(0.7)    | 523<br>(5.4)   | 2680<br>(11.9)  | 8683<br>(11.0)  |
| Missing n (%)                                                                                                                                                                                                                                                                                                                                                                                                   | 0 (0)           | 0 (0)           | 0 (0)          | 0 (0)          | 0 (0)          | 0 (0)          | 0 (0)          | 0 (0)          | 0 (0)         | 0 (0)          | 0 (0)           | 0 (0)           |
| Total medications                                                                                                                                                                                                                                                                                                                                                                                               |                 |                 |                |                |                |                |                |                |               |                |                 |                 |
| 0                                                                                                                                                                                                                                                                                                                                                                                                               | 5486<br>(17.4)  | 20815<br>(20)   | 742<br>(20.2)  | 1575<br>(22.4) | 104<br>(4.2)   | 212<br>(4.2)   | 603<br>(25.6)  | 851<br>(24.4)  | 207<br>(35.7) | 3092<br>(31.9) | 3830<br>(17.0)  | 15085<br>(19.2) |
| 1                                                                                                                                                                                                                                                                                                                                                                                                               | 1553<br>(4.9)   | 5934<br>(5.7)   | 225<br>(6.1)   | 505<br>(7.1)   | 41<br>(1.7)    | 99<br>(1.9)    | 125<br>(5.3)   | 183<br>(5.3)   | 49<br>(8.4)   | 845<br>(8.7)   | 1113<br>(5.0)   | 4302<br>(5.5)   |
| 2                                                                                                                                                                                                                                                                                                                                                                                                               | 1022<br>(3.2)   | 3712<br>(3.6)   | 139<br>(3.8)   | 279<br>(3.9)   | 38<br>(1.5)    | 58<br>(1.1)    | 72<br>(3.1)    | 106<br>(3.1)   | 47<br>(8.1)   | 439<br>(4.5)   | 726<br>(3.2)    | 2830<br>(3.6)   |
| 3                                                                                                                                                                                                                                                                                                                                                                                                               | 641<br>(2.0)    | 2495<br>(2.4)   | 89<br>(2.4)    | 161<br>(2.3)   | 26<br>(1.1)    | 80<br>(1.6)    | 55<br>(2.3)    | 89<br>(2.6)    | 24<br>(4.1)   | 293<br>(3.0)   | 447<br>(2.0)    | 1872<br>(2.4)   |
| 4                                                                                                                                                                                                                                                                                                                                                                                                               | 620<br>(2.0)    | 2205<br>(2.1)   | 68<br>(1.8)    | 155<br>(2.2)   | 35<br>(1.4)    | 71<br>(1.4)    | 51<br>(2.2)    | 96<br>(2.8)    | 14<br>(2.4)   | 206<br>(2.1)   | 452<br>(2.0)    | 1677<br>(2.1)   |
| >=5                                                                                                                                                                                                                                                                                                                                                                                                             | 22252<br>(70.5) | 68838<br>(66.2) | 2415<br>(65.7) | 4391<br>(62.1) | 2230<br>(90.1) | 4558<br>(89.8) | 1452<br>(61.5) | 2145<br>(61.8) | 239<br>(41.1) | 4833<br>(49.8) | 15916<br>(70.8) | 52911<br>(67.2) |
| Missing n (%)                                                                                                                                                                                                                                                                                                                                                                                                   | 0 (0)           | 0 (0)           | 0 (0)          | 0 (0)          | 0 (0)          | 0 (0)          | 0 (0)          | 0 (0)          | 0 (0)         | 0 (0)          | 0 (0)           | 0 (0)           |
| *Co-morbidities included Stroke, Chronic Kidney Disease, COPD, Asthma, Type 1 or 2 Diabetes, Cancer, Mental Health Disorders, Atrial Fibrillation, Cardiovascular Disease, Epilepsy, Heart Failure and Rheumatoid Arthritis                                                                                                                                                                                     |                 |                 |                |                |                |                |                |                |               |                |                 |                 |
| ** Medication included the last recorded repeat prescriptions and included anti-platelets, anti-coagulants, Angiotensin Converting Enzyme-Inhibitors, Angiotensin Receptor Blocker, Diuretics, Calcium-channel blockers, Beta blockers, Alpha blockers, Insulin, Oral hypoglycaemics, Non-opiate analgesics, Amitriptyline, Statins, NSAID, non-statin lipid lowering drugs, Proton-pump inhibitors and DMARDs. |                 |                 |                |                |                |                |                |                |               |                |                 |                 |
| This table reflects consultation numbers; some patients might be represented more than once                                                                                                                                                                                                                                                                                                                     |                 |                 |                |                |                |                |                |                |               |                |                 |                 |



|   |                     |                     |                              |                     |                       |                       |                     |                     |                         |                     |                     |                     |
|---|---------------------|---------------------|------------------------------|---------------------|-----------------------|-----------------------|---------------------|---------------------|-------------------------|---------------------|---------------------|---------------------|
| 0 | 1                   | 1                   | 1                            | 1                   | 1                     | 1                     | 1                   | 1                   | 1                       | 1                   | 1                   | 1                   |
| 1 | 1.38<br>(0.20-9.44) | 1.25<br>(1.01-1.56) | 1.80<br>(0.00-3541.67)       | 1.46<br>(0.96-2.21) | 1.45<br>(0.16-13.20)  | 1.37<br>(0.66-2.83)   | 1.26<br>(0.55-2.87) | 1.41<br>(0.56-3.57) | 1.62<br>(0.02 - 105.35) | 1.51<br>(0.75-3.05) | 1.27<br>(0.68-2.38) | 1.09<br>(0.94-1.27) |
| 2 | 1.53<br>(0.12-19.2) | 1.44<br>(1.06-1.96) | 1.97<br>(0.00-<br>13282.58)  | 1.73<br>(1.05-2.85) | 1.56<br>(0.11-21.39)  | 1.43<br>(0.65 -3.13)  | 0.71<br>(0.22-2.27) | 0.75<br>(0.17-3.24) | 1.72<br>(0.02-191.71)   | 1.59<br>(0.71-3.56) | 1.50<br>(0.53-4.27) | 1.30<br>(1.10-1.54) |
| 3 | 1.56<br>(0.11-22.0) | 1.42<br>(1.04-1.94) | 2.28<br>(0.00-<br>103139.80) | 1.87<br>(1.04-3.36) | 1.41<br>(0.18-11.01)  | 1.45<br>(0.69-3.05)   | 0.20<br>(0.02-1.95) | 0.31<br>(0.02-4.46) | 1.38<br>(0.08-22.69)    | 1.07<br>(0.46-2.52) | 1.72<br>(0.43-6.88) | 1.37<br>(1.13-1.65) |
| 4 | 1.41<br>(0.18-10.9) | 1.23<br>(0.95-1.60) | 1.17<br>(0.15-9.11)          | 0.96<br>(0.51-1.83) | 1.30<br>(0.25-6.92)   | 1.32<br>(0.60 - 2.89) | empty               | empty               | 1.87<br>(0.01-463.71)   | 1.58<br>(0.61-4.09) | 1.79<br>(0.41-7.89) | 1.37<br>(1.11-1.69) |
| 5 | 1.56<br>(0.11-21.4) | 1.36<br>(1.01-1.83) | 1.47<br>(0.01-197.73)        | 1.13<br>(0.63-2.02) | 2.46<br>(0.01-566.73) | 2.39<br>(1.23-4.65)   | 1 (empty)           | 1 (empty)           | 1.01<br>(0.43-2.38)     | 0.77<br>(0.30-1.98) | 1.76<br>(0.42-7.36) | 1.34<br>(1.09-1.65) |

\*Based on patients who had at least one consultation in each period.
